# Supplementary material for: Spent Coffee Grounds as Eco-Friendly Additives for Aluminum–Air Batteries
Source: PubMed Central journal article supplement — ACS Omega. 2021 Sep 27;6(39):25529–38. doi: 10.1021/acsomega.1c03533 (PMC8495842; doi:10.1021/acsomega.1c03533), 2021-09-27
Supplement: ao1c03533_si_001.pdf [file ao1c03533_si_001.pdf]

# Spent coffee grounds as eco-friendly additives for aluminum-air batteries

*Woohyuk Lee<sup>1</sup>, Seok-Ryul Choi<sup>1</sup>, Jung-Gu Kim<sup>1,\*</sup>*

---

<sup>1</sup> Affiliation: School of Advanced Materials Science and Engineering, Sungkyunkwan University, 2066, Seobu-Ro, Jangang-Gu, Suwon, Gyeonggi-Do, 16419, Republic of Korea

\* Corresponding author: kimjg@skku.ac.kr; +82 31 290 7360

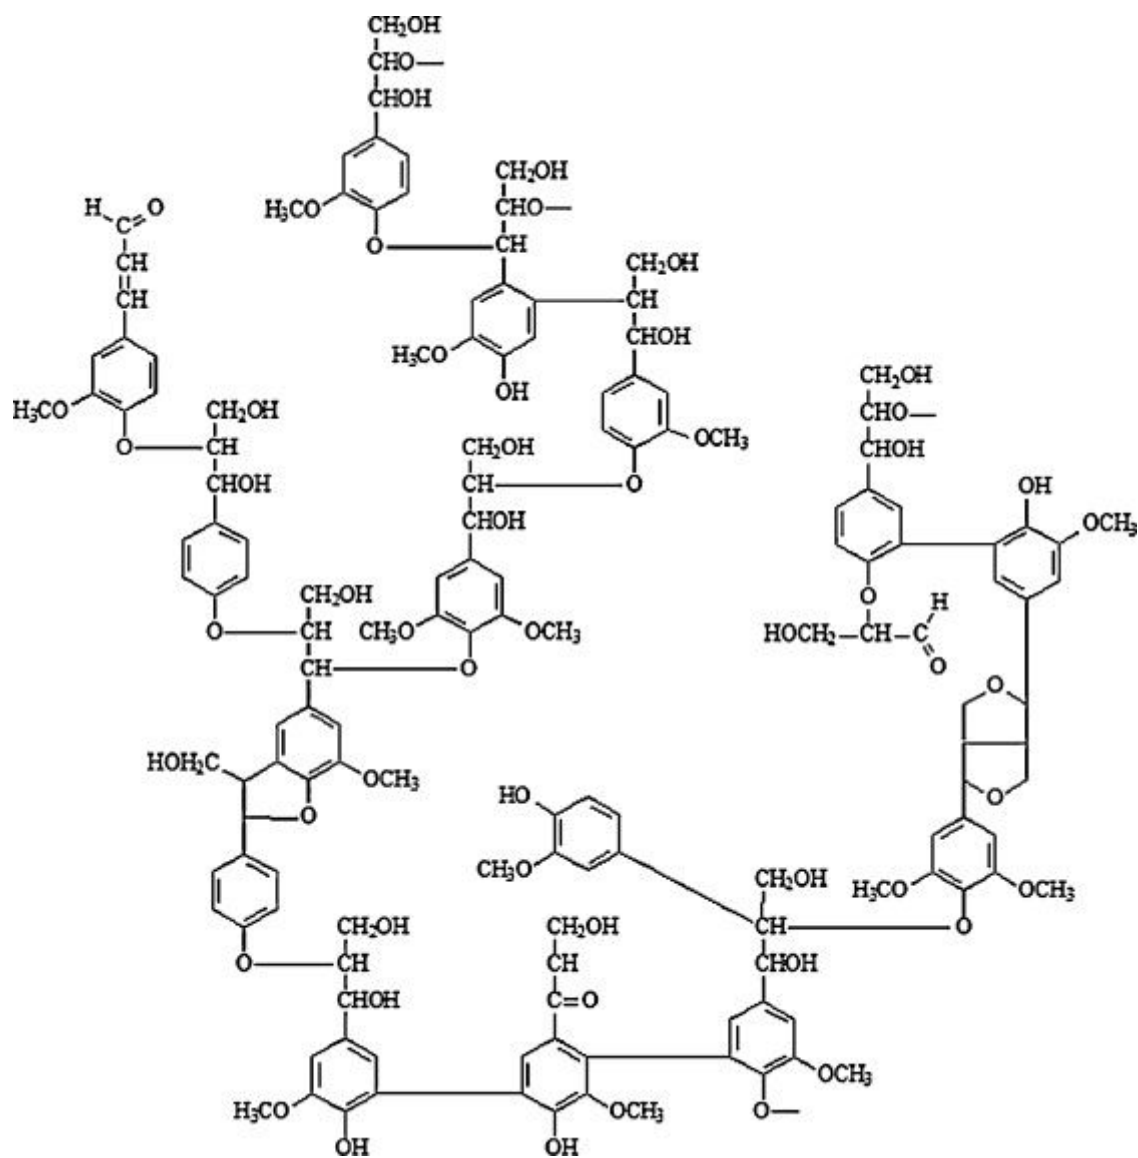

Figure S1. Representation of the lignin structure

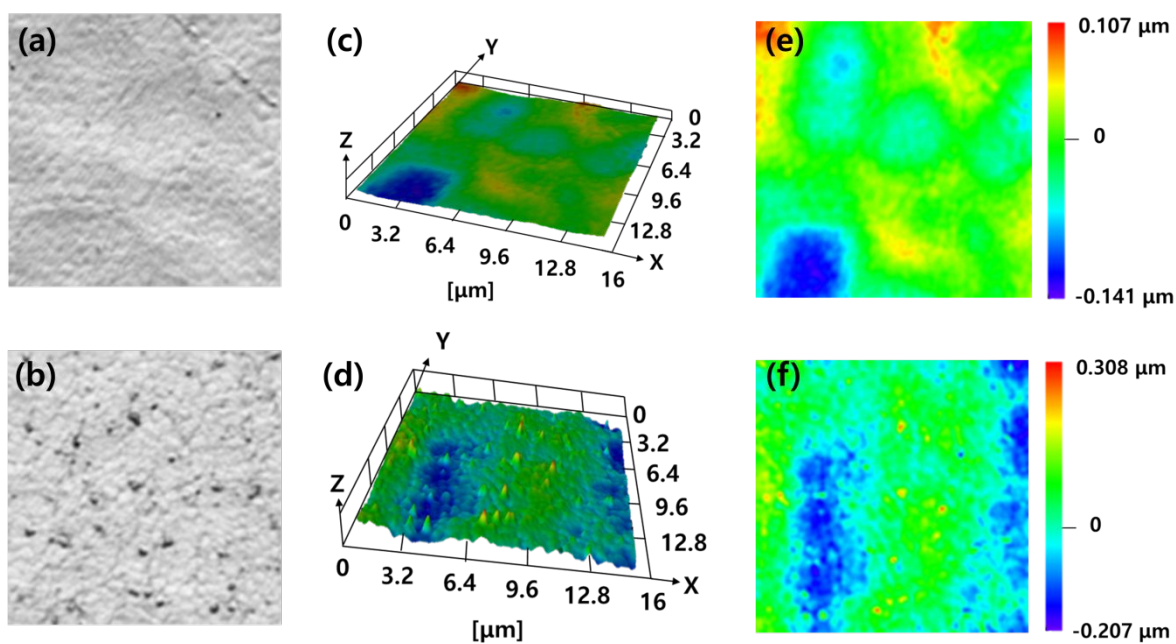

Figure S2. Laser scanning micrographs of aluminum surface after immersion in the absence of lignin molecules (a), (c), (e) and in the presence of lignin molecules (b), (d), (f): OM image of the surface without lignin molecules (a); 3D image of same area (c); 2D image of same area (e), OM image of the surface with lignin molecules (b); 3D image of same area (d); 2D image of same area (f).

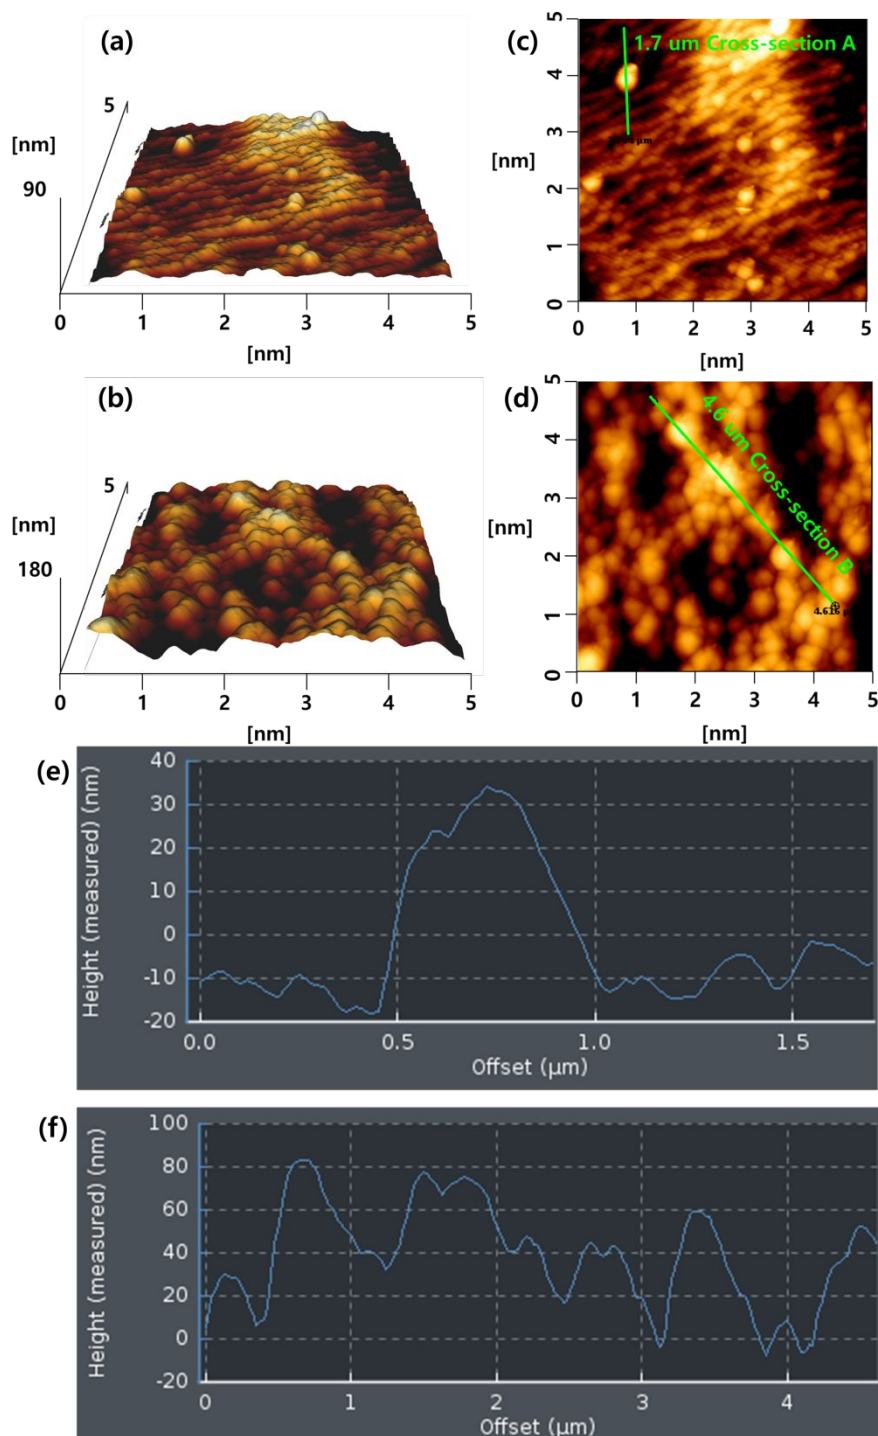

Figure S3. Atomic force micrographs of aluminum surface after immersion in the absence of lignin molecules (a), (c), (e) and in the presence of lignin molecules (b), (d), (f): 3D image of the surface without lignin molecules (a); 2D image of same area (c); Height profile on the

cross-section A (e), 3D image of the surface with lignin molecules (b); 3D image of same area (d); Height profile on the cross-section B (f).

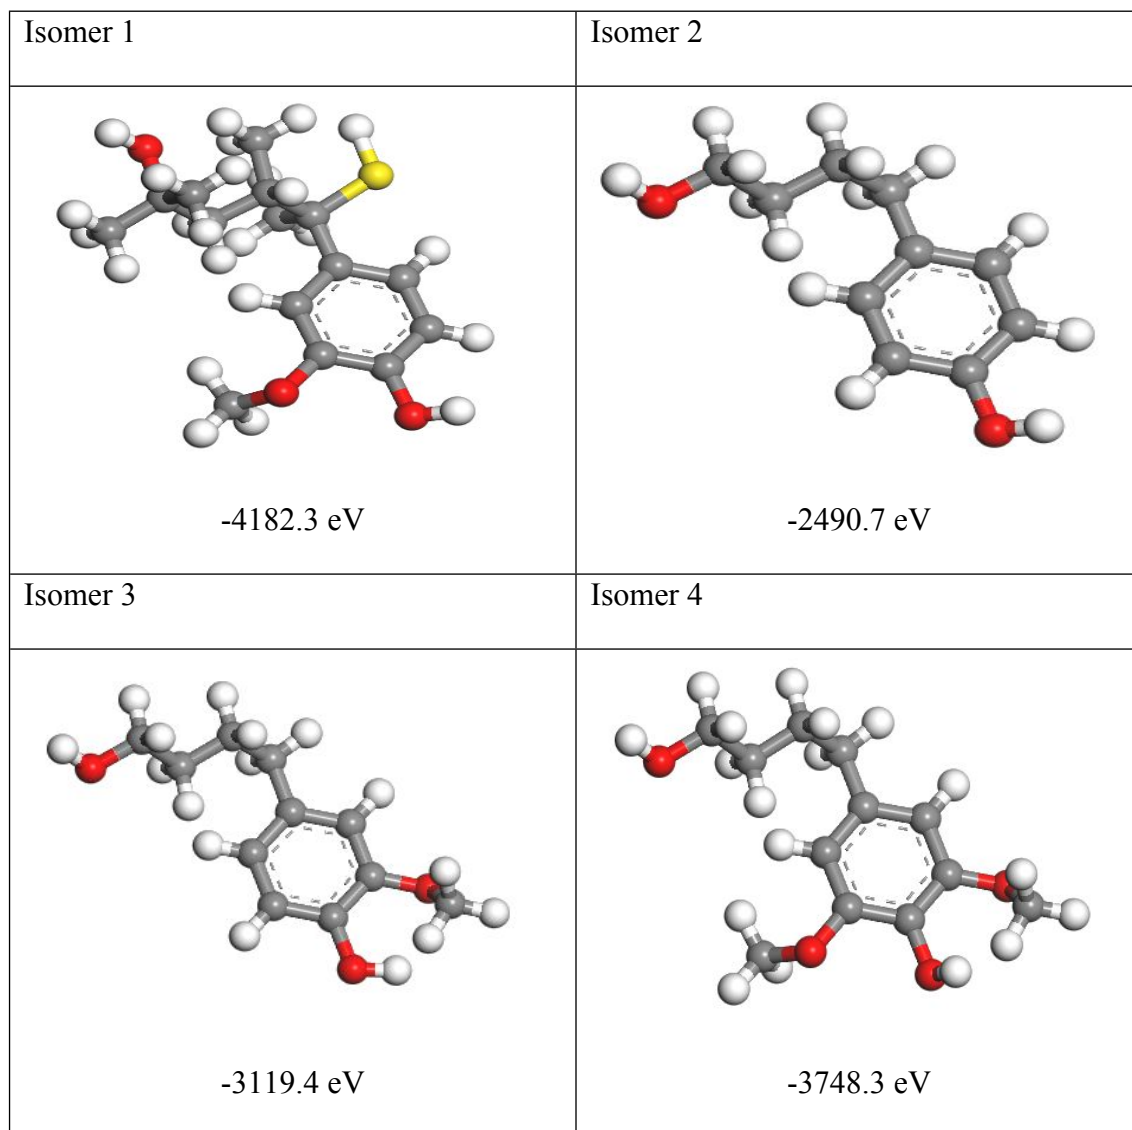

Figure S4. Optimized structures and relative energies for 4 types of geometrical conformers for lignin molecules

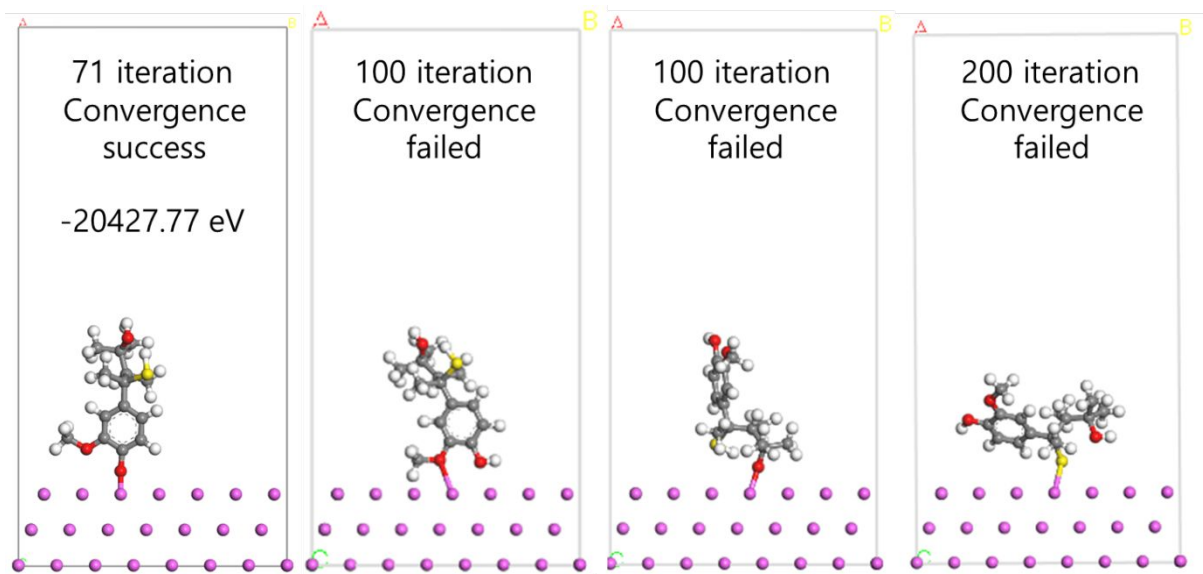

Figure S5. Geometrical optimization result for four different adsorption modes

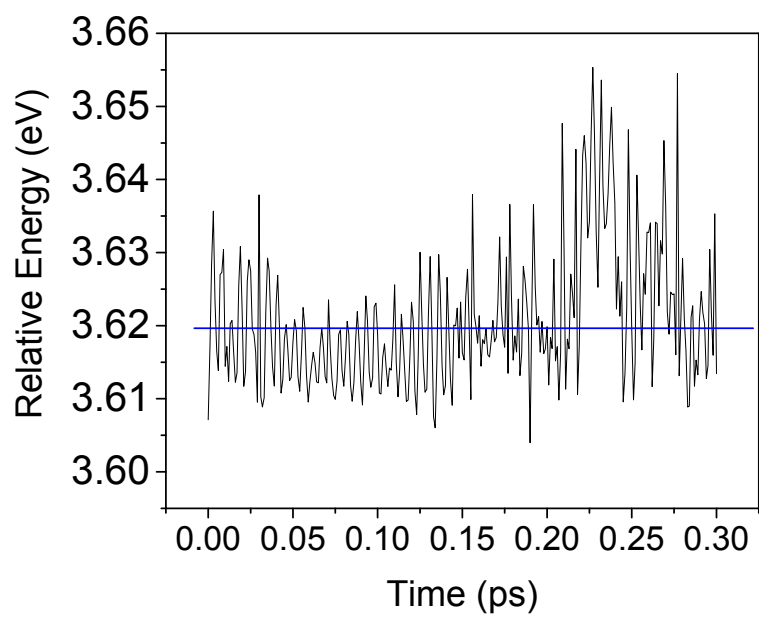

Figure S6. Total calculated energy variations (eV) during 0.3 ps of ab initio molecular dynamics (AIMD) simulation at 300k
